# Supplementary material for: Early Right Ventricular Apical Pacing-Induced Gene Expression Alterations Are Associated with Deterioration of Left Ventricular Systolic Function
Source: Hindawi journal article supplement (doi:10.1155/2017/8405196), 2017-01-01
Supplement: f1 [file 8405196.f1.pdf]

S1

**Table 1.** Primer sequences used for quantitative real-time PCR.

| <b>Gene</b>    | <b>Primers</b> | <b>Sequences</b>               |
|----------------|----------------|--------------------------------|
| <b>GAPDH</b>   | Forward Primer | 5'-CGGAGTCAACGGATTTGGTCGTAT-3' |
|                | Reverse Primer | 5'-AGCCTTCTCCATGGTGGTGAAGAC-3' |
| <b>OPA1</b>    | Forward Primer | 5'-GTGCTGCCCCGCCTAGAAA-3'      |
|                | Reverse Primer | 5'-TGACAGGCACCCGTACTCAGT-3'    |
| <b>SCREA2a</b> | Forward Primer | 5'-T GTGTAACGCCCTCAACAGC-3'    |
|                | Reverse Primer | 5'-GAGAATCACGGGCAAGGAGAT-3'    |

S2

**Table 2.** Intra- and inter-observer variability of LVEF and strain parameters.

| <b>Variables</b> | <b>Intra-observer CV (%)</b> | <b>Inter-observer CV (%)</b> |
|------------------|------------------------------|------------------------------|
| <b>LVEF</b>      | 5.8                          | 7.1                          |
| <b>GLS</b>       | 7.3                          | 8.7                          |
| <b>GRS</b>       | 11.2                         | 12.8                         |
| <b>GCS</b>       | 13.6                         | 15.2                         |
| <b>SDI</b>       | 12.5                         | 13.6                         |

LVEF, ejection fraction left ventricular; GLS, global longitudinal strain; GRS, global radial strain; GCS, global circumferential strain; SDI, standard deviation index of three-dimensional strain; CV, coefficient of variation.
